# Supplementary material for: Stepwise replacement of nickel with cobalt ions in a [Ni6] cluster
Source: Royal Society of Chemistry journal article supplement (doi:10.1039/c3dt50429h), 2013-01-01
Supplement: c3dt50429h.pdf [file c3dt50429h.pdf]

## Stepwise Replacement of Nickel with Cobalt Ions in a [Ni<sub>6</sub>] Cluster

Graham N. Newton, Hiroki Sato, Takuya Shiga, and Hiroki Oshio\*

### Supplementary Information

#### *Synthesis of H3L*

1,3-Bis-(2-hydroxyphenyl)-1,3-propanedione (H<sub>3</sub>L): Sodium hydride (6.4 g, 267 mmol) was suspended in 200 mL xylene, and 2-hydroxyacetophenone (4.53 g, 33 mmol) was added dropwise, followed by two drops of methanol and the resulting mixture brought to reflux for 10 minutes. Ethyl salicylate (4.53 g, 33 mmol) was then added dropwise and the reaction refluxed overnight. The yellow precipitate was then collected by vacuum filtration and washed with diethyl ether. The solid was then dissolved in 100 mL H<sub>2</sub>O and 20 mL dilute HCl (approx. 5%) was added, resulting in precipitation. The solid was collected and recrystallized from hot ethanol, yielding yellow crystalline 1,3-bis-(2-hydroxyphenyl)-1,3-propanedione (5.4 g, 21 mmol). <sup>1</sup>H NMR (400 MHz, D<sub>6</sub>-Acetone): δ 2.80 (s, 2H, CH<sub>2</sub>), 6.90 (m, 4H, ph), 7.25 (m, 2H, ph), 7.84 (m, 2H, ph).

Scheme S1: Structure of H<sub>3</sub>L.

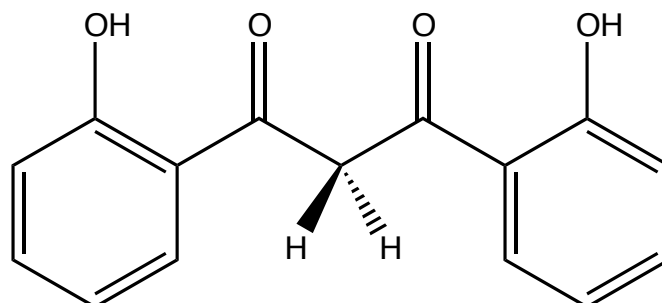

Table S1: Selected bonding distances and angles in **1**, **2** and **3**.

|           | Interaction | Distance (Å) | Interaction | Angle (°) |
|-----------|-------------|--------------|-------------|-----------|
| Complex 1 | Ni1-O6      | 2.006(6)     | Ni2-O9-Ni3  | 99.5(2)   |
|           | Ni1-O3      | 2.014(6)     | Ni2-O9-Ni1  | 95.8(2)   |
|           | Ni1-O4      | 2.020(6)     | Ni3-O9-Ni1  | 95.9(2)   |
|           | Ni1-O10     | 2.022(6)     | Ni1-O10-Ni2 | 95.8(2)   |
|           | Ni1-O7      | 2.024(6)     | Ni1-O10-Ni2 | 96.4(2)   |
|           | Ni1-O9      | 2.098(6)     | Ni2-O10-Ni2 | 97.6(2)   |
|           | Ni2-O8      | 1.994(6)     | Ni1-O3-Ni3  | 97.8(3)   |
|           | Ni2-O7      | 2.005(6)     | Ni2-O7-Ni1  | 96.8(2)   |
|           | Ni2-O9      | 2.010(6)     | Ni2-O8-Ni3  | 96.4(2)   |
|           | Ni2-O10     | 2.039(6)     |             |           |
|           | Ni2-O10     | 2.067(6)     |             |           |
|           | Ni2-O13     | 2.120(6)     |             |           |
|           | Ni3-O2      | 2.000(6)     |             |           |
|           | Ni3-O9      | 2.026(6)     |             |           |
|           | Ni3-O3      | 2.051(6)     |             |           |
|           | Ni3-O12     | 2.063(7)     |             |           |
|           | Ni3-O11     | 2.115(6)     |             |           |
|           | Ni3-O8      | 2.135(6)     |             |           |
| Complex 2 | Ni1-O4      | 1.996(3)     | Co1-O9-Ni2  | 99.27(15) |
|           | Ni1-O3      | 2.005(2)     | Co1-O9-Ni1  | 97.41(14) |
|           | Ni1-O6      | 2.012(3)     | Ni2-O9-Ni1  | 95.54(9)  |
|           | Ni1-O7      | 2.021(2)     | Ni1-O10-Ni2 | 95.73(9)  |
|           | Ni1-O10     | 2.031(2)     | Ni1-O10-Ni2 | 96.94(10) |
|           | Ni1-O9      | 2.100(2)     | Ni2-O10-Ni2 | 97.67(10) |
|           | Ni2-O8      | 1.991(2)     | Ni1-O3-Co1  | 98.31(15) |
|           | Ni2-O7      | 2.013(2)     | Ni2-O7-Ni1  | 96.82(10) |
|           | Ni2-O9      | 2.029(2)     | Ni2-O8-Co1  | 96.55(14) |
|           | Ni2-O10     | 2.039(2)     | Ni3-O9-Ni2  | 99.32(12) |
|           | Ni2-O10     | 2.053(2)     | Ni3-O9-Ni1  | 95.96(10) |
|           | Ni2-O13     | 2.114(2)     | Ni1-O3-Ni3  | 97.92(12) |
|           | Ni3-O2      | 2.015(4)     | Ni2-O8-Ni3  | 95.93(11) |
|           | Ni3-O9      | 2.018(3)     |             |           |
|           | Ni3-O12     | 2.053(3)     |             |           |
|           | Ni3-O3      | 2.076(3)     |             |           |
|           | Ni3-O8      | 2.160(3)     |             |           |
|           | Ni3-O11     | 2.173(3)     |             |           |
|           | Co1-O2      | 2.005(5)     |             |           |
|           | Co1-O9      | 2.021(4)     |             |           |
| Co1-O12   | 2.039(4)    |              |             |           |
| Co1-O3    | 2.106(4)    |              |             |           |
| Co1-O8    | 2.159(5)    |              |             |           |
| Co1-O11   | 2.176(5)    |              |             |           |
| Complex 3 | Ni1-O4      | 1.994(3)     | Co1-O9-Ni2  | 99.53(11) |
|           | Ni1-O6      | 2.016(3)     | Co1-O9-Ni1  | 96.79(11) |
|           | Ni1-O3      | 2.017(3)     | Ni2-O9-Ni1  | 95.56(11) |
|           | Ni1-O7      | 2.032(3)     | Ni1-O10-Ni2 | 95.81(10) |
|           | Ni1-O10     | 2.037(3)     | Ni1-O10-Ni2 | 97.43(12) |
|           | Ni1-O9      | 2.116(3)     | Ni2-O10-Ni2 | 97.84(11) |
|           | Ni2-O8      | 1.995(3)     | Ni2-O7-Ni7  | 96.62(11) |
|           | Ni2-O7      | 2.020(3)     | Ni1-O3-Co1  | 97.91(12) |
|           | Ni2-O9      | 2.037(3)     | Ni2-O8-Co1  | 96.06(11) |
|           | Ni2-O10     | 2.040(3)     |             |           |
|           | Ni2-O10     | 2.057(3)     |             |           |
|           | Ni2-O13     | 2.123(3)     |             |           |
|           | Co1-O2      | 2.021(3)     |             |           |
|           | Co1-O9      | 2.027(3)     |             |           |
|           | Co1-O12     | 2.063(3)     |             |           |
|           | Co1-O3      | 2.091(3)     |             |           |
|           | Co1-O8      | 2.174(3)     |             |           |
|           | Co1-O11     | 2.198(3)     |             |           |

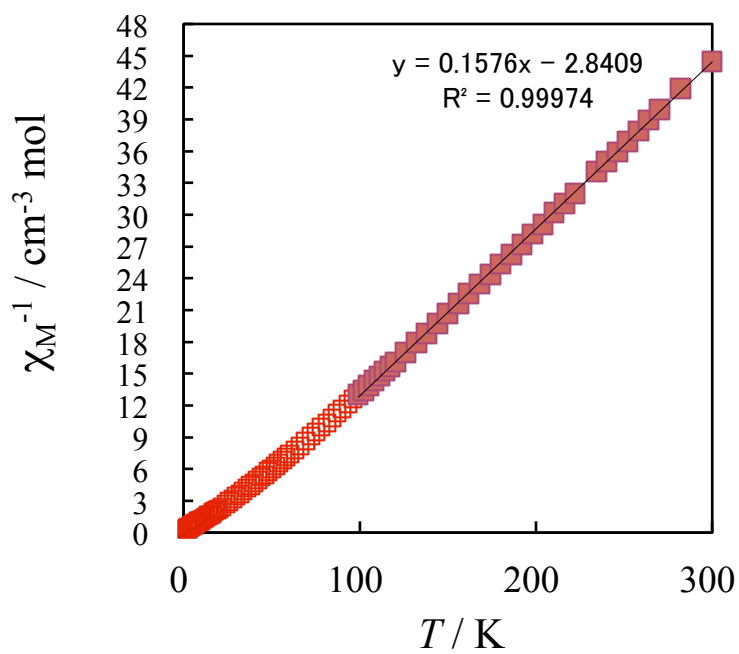

Figure S1: Curie-Weiss plot of **1**. A Weiss constant of +18.02 K was calculated from the line of best-fit.

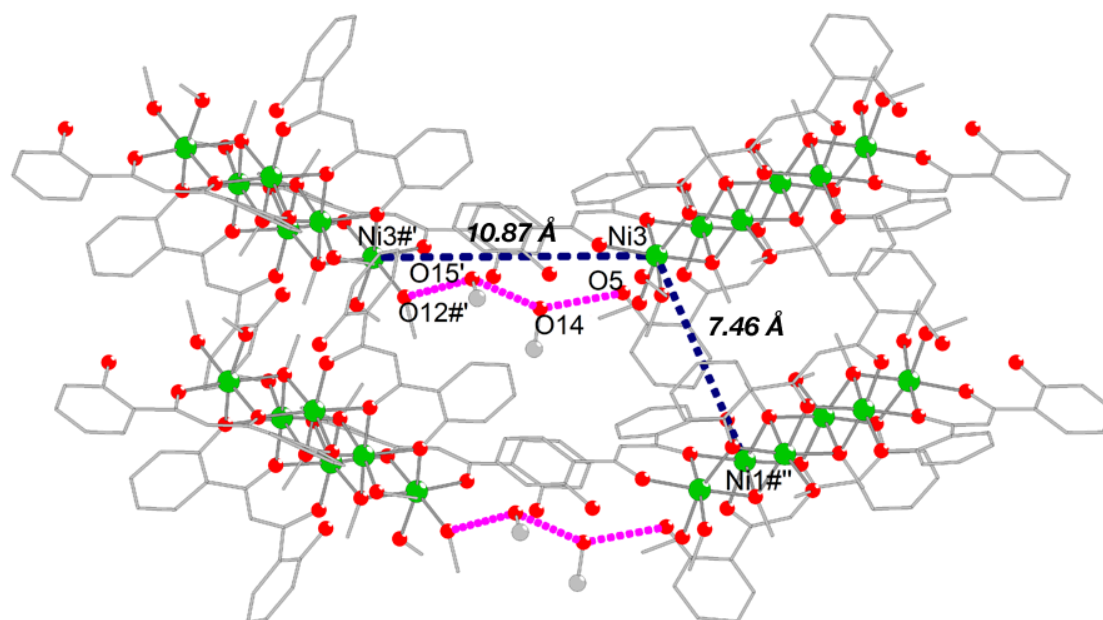

Figure S2: Four cluster units of **1**, illustrating the intermolecular interactions. Blue dashed lines are Ni<sup>II</sup>···Ni distances and pink dashed lines illustrate the hydrogen bonded interactions between clusters and methanol molecules. Symmetry operators used in diagram:  $-x, -y, 1-z$ ; #':  $0.5-x, -0.5+y, 1.5-z$ ; #'':  $-1-x, -y, 1-z$ .

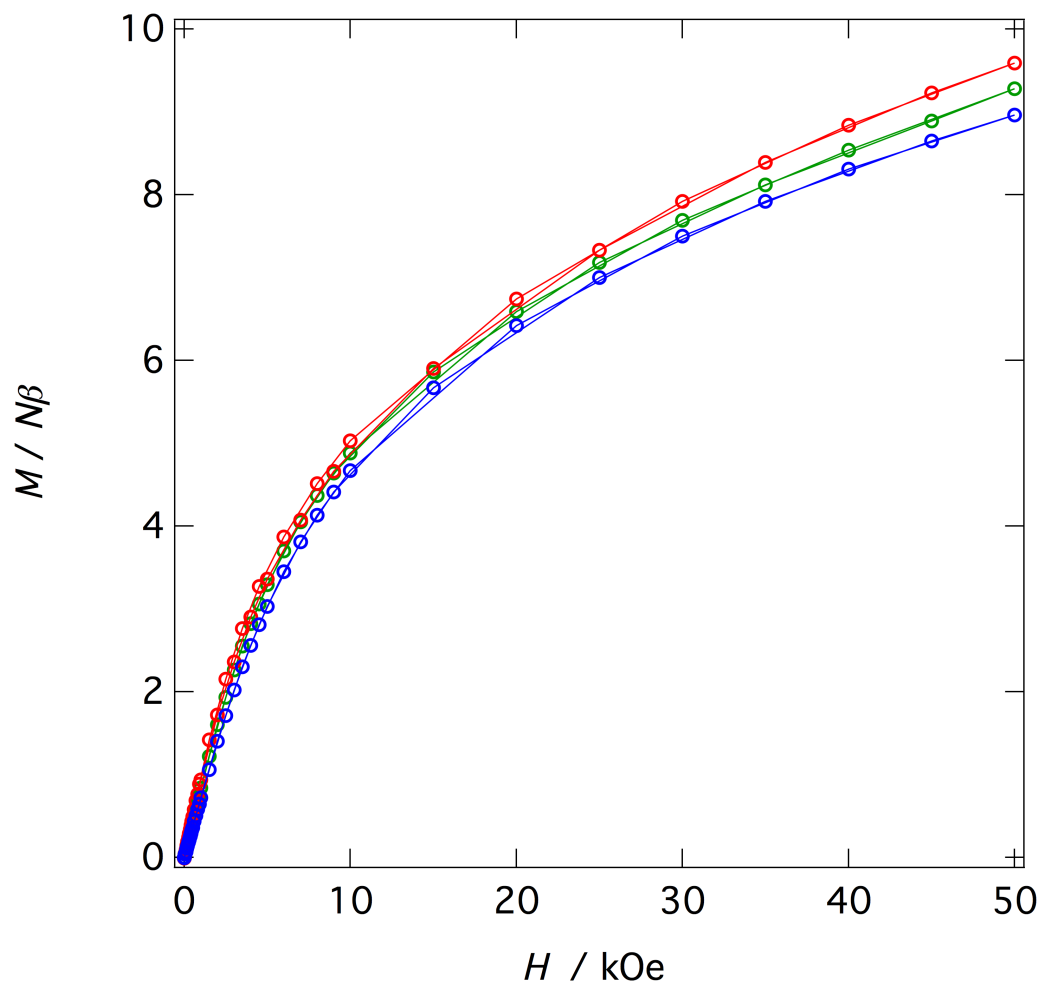

Figure S3: Field dependence of magnetisation plots of **1** (blue), **2** (green) and **3** (red).

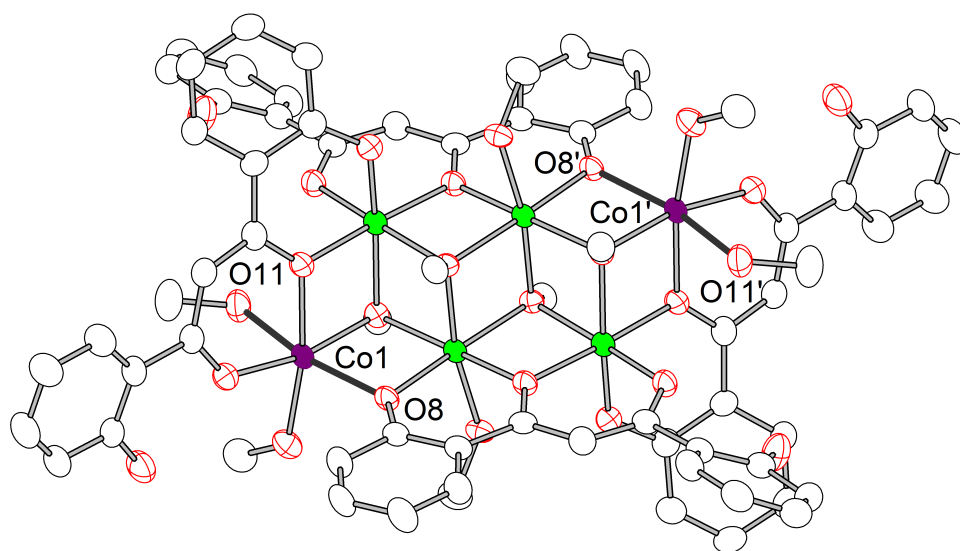

Figure S4: The elongation axes of the cobalt ions in complex **3**. Nickel ions in green, cobalt in purple, oxygen in red and carbon in white. The elongated Co–O bonds are shown in dark grey.
